# Supplementary material
Source: HighWire-hosted journal article supplement (https://jmg.bmj.com/content/jmedgenet-2019-106759)
Supplement: inline-supplementary-material-2 [file inline-supplementary-material-2.pdf]

## Appendix 2: Example of CanVIG-UK classification summary report

| <b>Variant classification by Can-VIG UK (Cancer Variant Interpretation UK)</b>                                                                                                                                                                                                                                                                                                                                                                                                                                                                               |                                                                                                                                                                                                                                                                                                                                                                                                                                                                                                                                                         |                                             |                      |
|--------------------------------------------------------------------------------------------------------------------------------------------------------------------------------------------------------------------------------------------------------------------------------------------------------------------------------------------------------------------------------------------------------------------------------------------------------------------------------------------------------------------------------------------------------------|---------------------------------------------------------------------------------------------------------------------------------------------------------------------------------------------------------------------------------------------------------------------------------------------------------------------------------------------------------------------------------------------------------------------------------------------------------------------------------------------------------------------------------------------------------|---------------------------------------------|----------------------|
| Can-VIG UK is a working group convened on behalf of the UK ACGS (Association of Clinical Genetic Scientists), which includes registered clinical scientists and clinical geneticists representing the following UK Regional molecular diagnostic laboratories: Aberdeen, Belfast, Birmingham, Bristol, Cambridge, Cardiff, Dublin, Exeter, Glasgow, GOSH, Guy's, Leeds, Liverpool (Cheshire & Merseyside), Oxford, Manchester, Newcastle, Nottingham, Sheffield, SW Thames (St George's), Wessex (Salisbury/Southampton), University Hospitals of Leicester. |                                                                                                                                                                                                                                                                                                                                                                                                                                                                                                                                                         |                                             |                      |
| <b>Submitter</b>                                                                                                                                                                                                                                                                                                                                                                                                                                                                                                                                             | Dr Clare Turnbull MD PhD FRCP FRCPATH                                                                                                                                                                                                                                                                                                                                                                                                                                                                                                                   |                                             | <b>Date</b>          |
| <b>Gene</b>                                                                                                                                                                                                                                                                                                                                                                                                                                                                                                                                                  | BRCA1                                                                                                                                                                                                                                                                                                                                                                                                                                                                                                                                                   | <b>Transcript</b>                           | <b>Variant</b>       |
|                                                                                                                                                                                                                                                                                                                                                                                                                                                                                                                                                              |                                                                                                                                                                                                                                                                                                                                                                                                                                                                                                                                                         | NM_007294.3<br>ENST00000357654<br>LRG_292t1 | c.53T>C (p.Met18Thr) |
| <b>Population data</b>                                                                                                                                                                                                                                                                                                                                                                                                                                                                                                                                       | <p>The variant was observed in 7 independent UK families undergoing clinical diagnostic testing, the denominator of which dataset of clinical testing was 25,773. Case control comparison against ethnically matched population data (7/25,773 in familial cases against 0/64,603 GNOMAD NFE controls <math>p_{\text{exact}} = 0.0015</math>)</p> <p>There are additional reports of this variant in ClinVar (6), BIC (3) LOVD3 (22), UMD(7), DMuDB(7)</p> <p>The variant is absent in the remainder of the GNOMAD populations (76,853 individuals)</p> |                                             |                      |
| <b>Prediction (based on variant type/location), IN silico tools</b>                                                                                                                                                                                                                                                                                                                                                                                                                                                                                          | <p><b>AlignGVGD class:</b> C45<br/> <b>SIFT prediction:</b> deleterious<br/> <b>MAPP prediction:</b> bad<br/> <b>Polyphen2 HumVar prediction:</b> benign<br/> <b>CADD scaled score [0-99]:</b> 16.18<br/> <b>SuSPect score [0-100]:</b> 95</p>                                                                                                                                                                                                                                                                                                          |                                             |                      |
| <b>Functional data</b>                                                                                                                                                                                                                                                                                                                                                                                                                                                                                                                                       | Findlay <i>et al.</i> 2018: Non-functional via saturation editing analysis using haploid <i>BRCA1</i> construct                                                                                                                                                                                                                                                                                                                                                                                                                                         |                                             |                      |
| <b>Segregation data</b>                                                                                                                                                                                                                                                                                                                                                                                                                                                                                                                                      |                                                                                                                                                                                                                                                                                                                                                                                                                                                                                                                                                         |                                             |                      |
| <b>De novo data</b>                                                                                                                                                                                                                                                                                                                                                                                                                                                                                                                                          |                                                                                                                                                                                                                                                                                                                                                                                                                                                                                                                                                         |                                             |                      |
| <b>Allelic data (biallelic observations)</b>                                                                                                                                                                                                                                                                                                                                                                                                                                                                                                                 |                                                                                                                                                                                                                                                                                                                                                                                                                                                                                                                                                         |                                             |                      |
| <b>Other classifications</b>                                                                                                                                                                                                                                                                                                                                                                                                                                                                                                                                 | Ambry LP 2018, Gene Dx LP 2018, Counsyl LP 2018 Color LP 2018<br>Enigma 2019 (multifactorial analysis): pathogenic                                                                                                                                                                                                                                                                                                                                                                                                                                      |                                             |                      |
| <b>Other</b>                                                                                                                                                                                                                                                                                                                                                                                                                                                                                                                                                 |                                                                                                                                                                                                                                                                                                                                                                                                                                                                                                                                                         |                                             |                      |

| <b>PATHOGENIC Criteria</b> | <b>Weight (supporting, moderate, strong, very strong)</b> | <b>BENIGN Criteria</b>  | <b>Weight (supporting, strong)</b> |
|----------------------------|-----------------------------------------------------------|-------------------------|------------------------------------|
| PVS1 (null)                |                                                           | BS1/BA1 (controls)      |                                    |
| PS4 (case control)         | Very strong                                               | BP4 (in silico)         |                                    |
| PM2 (absent control)       | Mod                                                       | BP1 (only trunc)        |                                    |
| PP3 (in silico)            |                                                           | BP7 (synonymous)        |                                    |
| PM5 (same residue)         |                                                           | BP3 (in frame, no func) |                                    |
| PM1 (hot spot)             |                                                           | BS3 (functional assay)  |                                    |
| PP1 (Segregation)          |                                                           | BS4 (non segregation)   |                                    |
| PS3 (functional assay)     | Strong                                                    | BP2 (biallelic)         |                                    |
| PM3 (biallelic)            |                                                           | BP6 (other databases)   |                                    |
| PP5 (other databases)      | Sup                                                       | Alternative cause (BP5) |                                    |
| Specific phenotype (PP4)   |                                                           |                         |                                    |
| De novo (PM6, PS2)         |                                                           |                         |                                    |
| <b>Total</b>               | 1 very strong, 1 strong, 1 mod, 1 sup                     | <b>Total</b>            |                                    |
| <b>Classification</b>      | 5-Pathogenic                                              |                         |                                    |

### Appendix 3: CanVIG-UK Consensus Guidance for Variants of Reduced Penetrance in High Penetrance Cancer Susceptibility Genes

|                                                                                                                                                                                                                                                                                                                                                                                                                                                                                                                                                                                                                                                            |
|------------------------------------------------------------------------------------------------------------------------------------------------------------------------------------------------------------------------------------------------------------------------------------------------------------------------------------------------------------------------------------------------------------------------------------------------------------------------------------------------------------------------------------------------------------------------------------------------------------------------------------------------------------|
| <ul style="list-style-type: none"> <li>• Variant interpretation and classification should be undertaken using the ACMG framework (with ACGS and CanVIG-UK specifications)</li> <li>• If any of the below criteria are met, the variant should be assigned the relevant ACMG class but with addendum of “reduced penetrance”</li> <li>• The report should reference and recommend the nationally ratified clinical management recommendations for that gene for variants of reduced penetrance</li> <li>• Clinical management recommendations for variants of reduced penetrance for each gene should be established by disease-specific experts</li> </ul> |
| <p><b>Criterion 1: Down-modification of classic biallelic phenotype</b></p> <p>Abnormal physical AND cellular phenotype associated with biallelic mutations is present but notably milder</p> <p><b>Example:</b> BRCA2-related Fanconi anaemia:</p> <ul style="list-style-type: none"> <li>• Cancer is not penetrant by 5 years <b>AND</b></li> <li>• Congenital abnormalities and physical features are mild <b>AND</b></li> <li>• Incomplete functional abrogation of chromosomal breakage following mitomycin C exposure <b>OR</b> BRCA2-specific assays show only modest depletion of BRCA2 in quantity and/or function</li> </ul>                     |
| <p><b>Criterion 2: Well calibrated assay gives intermediate effect</b></p> <ul style="list-style-type: none"> <li>• Highly predictive and well-calibrated published functional assay demonstrate intermediate effect, ie significant impairment of protein function but not at level demonstrated for truncating mutations in gene (e.g. Guidugli et al for BRCA2<sup>13 14</sup>, Findlay et al 2019 for BRCA1<sup>15</sup>)</li> </ul>                                                                                                                                                                                                                   |
| <p><b>Criterion 3: Segregation analysis gives lower estimate of penetrance</b></p> <ul style="list-style-type: none"> <li>• Formal genetic epidemiologic analyses demonstrate variant to be associated with disease but of penetrance statistically significantly reduced compared to established estimates eg: BRCA1 c.5096G&gt;A p.Arg1699Gln<sup>16 17</sup></li> </ul>                                                                                                                                                                                                                                                                                 |

- ClinGen CDH1 Expert Panel Specifications to the ACMG/AMP Variant Interpretation Guidelines Version 2, 2019.
- Guidugli L, Carreira A, Caputo SM, Ehlen A, Galli A, Monteiro AN, Neuhausen SL, Hansen TV, Couch FJ, Vreeswijk MP. Functional assays for analysis of variants of uncertain significance in BRCA2. *Human mutation* 2014;35(2):151-64. doi: 10.1002/humu.22478 [published Online First: 2013/12/11]
- Guidugli L, Shimelis H, Masica DL, Pankratz VS, Lipton GB, Singh N, Hu C, Monteiro ANA, Lindor NM, Goldgar DE, Karchin R, Iversen ES, Couch FJ. Assessment of the Clinical Relevance of BRCA2 Missense Variants by Functional and Computational Approaches. *American journal of human genetics* 2018;102(2):233-48. doi: 10.1016/j.ajhg.2017.12.013 [published Online First: 2018/02/06]
- Findlay GM, Daza RM, Martin B, Zhang MD, Leith AP, Gasperini M, Janizek JD, Huang X, Starita LM, Shendure J. Accurate functional classification of thousands of BRCA1 variants with saturation genome editing. *bioRxiv* 2018
- Spurdle AB, Whiley PJ, Thompson B, Feng B, Healey S, Brown MA, Pettigrew C, Van Asperen CJ, Ausems MG, Kattentidt-Mouravieva AA, van den Ouweland AM, Lindblom A, Pigg MH, Schmutzler RK, Engel C, Meindl A, Caputo S, Sinilnikova OM, Lidereau R, Couch FJ, Guidugli L, Hansen T, Thomassen M, Eccles DM, Tucker K, Benitez J, Domchek SM, Toland AE, Van Rensburg EJ, Wappenschmidt B, Borg A, Vreeswijk MP, Goldgar DE. BRCA1 R1699Q variant displaying ambiguous functional

- abrogation confers intermediate breast and ovarian cancer risk. *Journal of medical genetics* 2012;49(8):525-32. doi: 10.1136/jmedgenet-2012-101037 [published Online First: 2012/08/15]
17. Moghadasi S, Meeks HD, Vreeswijk MP, Janssen LA, Borg A, Ehrencrona H, Paulsson-Karlsson Y, Wappenschmidt B, Engel C, Gehrig A, Arnold N, Hansen TVO, Thomassen M, Jensen UB, Kruse TA, Ejlertsen B, Gerdes AM, Pedersen IS, Caputo SM, Couch F, Hallberg EJ, van den Ouweland AM, Collee MJ, Teugels E, Adank MA, van der Luijt RB, Mensenkamp AR, Oosterwijk JC, Blok MJ, Janin N, Claes KB, Tucker K, Viassolo V, Toland AE, Eccles DE, Devilee P, Van Asperen CJ, Spurdle AB, Goldgar DE, Garcia EG. The BRCA1 c. 5096G>A p.Arg1699Gln (R1699Q) intermediate risk variant: breast and ovarian cancer risk estimation and recommendations for clinical management from the ENIGMA consortium. *Journal of medical genetics* 2018;55(1):15-20. doi: 10.1136/jmedgenet-2017-104560 [published Online First: 2017/05/12]

**Supplementary table 1: Variants reclassified to date in CanVIG-UK multidisciplinary meeting; RP: reduced penetrance**

| Date of CanVIG-UK review | Gene   | Variant                     | Previous UK clinical classifications: most common (others) | CanVIG-UK consensus classification | Submission to ClinVar |
|--------------------------|--------|-----------------------------|------------------------------------------------------------|------------------------------------|-----------------------|
| Nov-17                   | BRCA1  | c.53T>C p.Met18Thr          | 4 (3,5)                                                    | 5                                  | Y                     |
| Dec-17                   | BRCA2  | c.8063T>C p.Leu2688Pro      | 3 (4,5)                                                    | 5                                  | Y                     |
| Jan-18                   | BRCA1  | c.4096+3A>G                 | 3 (2, 4)                                                   | 2                                  | Y                     |
| Feb-18                   | BRCA1  | c.442-22_442-13del          | 3 (4,5)                                                    | 4                                  | Y                     |
| Mar-18                   | MLH1   | c.122A>G p.Asp41Gly         | 3 (4,5)                                                    | 5                                  | Y                     |
| April-18                 | TP53   | c.998G>A p.Arg333His        | 3 (4)                                                      | 3                                  | Y                     |
| Jun-18                   | BRCA2  | c.9302T>G p.Leu3101Arg      | 4 (3,5)                                                    | 5                                  | Y                     |
| Jul-18                   | BRCA1  | c.4963T>C p.Ser1655Pro      | 4 (3,5)                                                    | 5                                  | Y                     |
| Jul-18                   | BRCA1  | c.4964C>T p.Ser1655Phe      | 4 (3,5)                                                    | 5                                  | Y                     |
| Jul-18                   | BRCA1  | c.5207T>C p.Val1736Ala      | 3 (4)                                                      | 5                                  | Y                     |
| Aug-18                   | BRCA1  | c.4357+6T>C                 | 3 (4,5)                                                    | 5                                  | Y                     |
| Aug-18                   | BRCA2  | c.8378G>A p.Gly2793Glu      | 3 (4,5)                                                    | 5                                  | Y                     |
| Sep-18                   | BRCA2  | c.8524C>T p.Arg2842Cys      | 3 (4,5)                                                    | 5 RP                               | Y                     |
| Oct-18                   | MLH1   | c.1676T>G p.Leu559Arg       | 3 (4,5)                                                    | 4                                  | Y                     |
| Nov-18                   | MSH2   | c.1807G>A p.Asp603Asn       | 4 (3,5)                                                    | 4                                  | Y                     |
| Jan-19                   | MLH1   | c.440G>T p.Gly147Val        | 3 (4)                                                      | 3                                  | Y                     |
| Mar-19                   | MLH1   | c.794G>A p.Arg265His        | 3                                                          | 3                                  | Y                     |
| Apr-19                   | BRCA1  | c.5357T>C p.Leu1786Pro      | 3 (4)                                                      | 4                                  | Y                     |
| Apr-19                   | MLH1   | c.1595G>A p.Gly532Asp       | 3 (4,5)                                                    | 4                                  | Y                     |
| May-19                   | APC    | c.2497A>C p.Ser833Arg       | 3 (2)                                                      | 3                                  | Y                     |
| May-19                   | APC    | c.6724A>G p.Ser2242Gly      | 3 (2)                                                      | 2                                  | Y                     |
| May-19                   | BMPR1A | c.1328G>A p.Arg443His       | 3 (4,5)                                                    | 4                                  | Y                     |
| May-19                   | BRCA1  | c.5153-26 A>G               | 3 (4,5)                                                    | 3                                  | Y                     |
| May-19                   | BRCA2  | c.520C>T p.Arg174Cys        | 3 (4)                                                      | 3                                  | Y                     |
| Sep-19                   | TP53   | c.799C>T p.Arg267Trp        | 3 (4,5)                                                    | 4                                  | Y                     |
| Oct-19                   | TP53   | c.1141A>G p.Lys381Glu       | 3 (4)                                                      | 3                                  | Y                     |
| Oct-19                   | TP53   | c.322G>C p.Gly108Arg        | 4 (3,5)                                                    | 3                                  | Y                     |
| Oct-19                   | TP53   | c.472 C>T p.Arg158Cys       | 3                                                          | 3                                  | Y                     |
| Oct-19                   | TP53   | c.794T>A p.Leu265Gln        | 3 (4,5)                                                    | 4                                  | Y                     |
| Oct-19                   | TP53   | c.560-14_560-13delCT        | 3 (4,5)                                                    | 3                                  | Y                     |
| Jan-20                   | TP53   | c.453-455delCCC p.Pro153del | 3 (4,5)                                                    | 3                                  | Y                     |
